# Supplementary material for: A retrospective study of magnetic resonance sialography imaging applied in the prognostic evaluation of chronic obstructive parotitis
Source: PubMed Central journal article supplement — Quant Imaging Med Surg. 2023 Sep 12;13(10):6363–73. doi: 10.21037/qims-22-1452 (PMC10585527; doi:10.21037/qims-22-1452), 2023-09-12
Supplement: qims-13-10-6363-supplementary.pdf [file qims-13-10-6363-supplementary.pdf]

## Supplementary

**Table S1** Consistency test of classification by radiologists

| MRS characteristic        | Kappa | P value |
|---------------------------|-------|---------|
| Stenosis classification   | 0.866 | 0.000** |
| Dilatation classification | 0.897 | 0.000** |

Stenosis and dilatation classification was analyzed using the weighted Cohen's kappa in order to explore inter-observer variability. Weighted Cohen's kappa scores in these comparisons were 0.785 and 0.895 respectively. \*\*, P<0.01.

**Table S2** Consistency test of measurement data by radiologists

| MRS characteristic      | ICC   | 95% CI      |
|-------------------------|-------|-------------|
| Diameter of branch duct | 0.834 | 0.627–0.931 |
| Ductal width            | 0.983 | 0.969–0.991 |

Inter-observer variability of diameter of branch duct and ductal width were evaluated using Intraclass correlation coefficient.
